# Supplementary material
Source: publisher site journal article supplement (https://www.spandidos-publications.com/1317/downloadSupplementary)

Figure S1. Summary schematic depicting the molecular mechanisms of Spred2-mediated inhibition of EMT in colon cancer cells. Spred2, sprouty-related EVH1 domain protein 2; EMT, epithelial-mesenchymal transition.

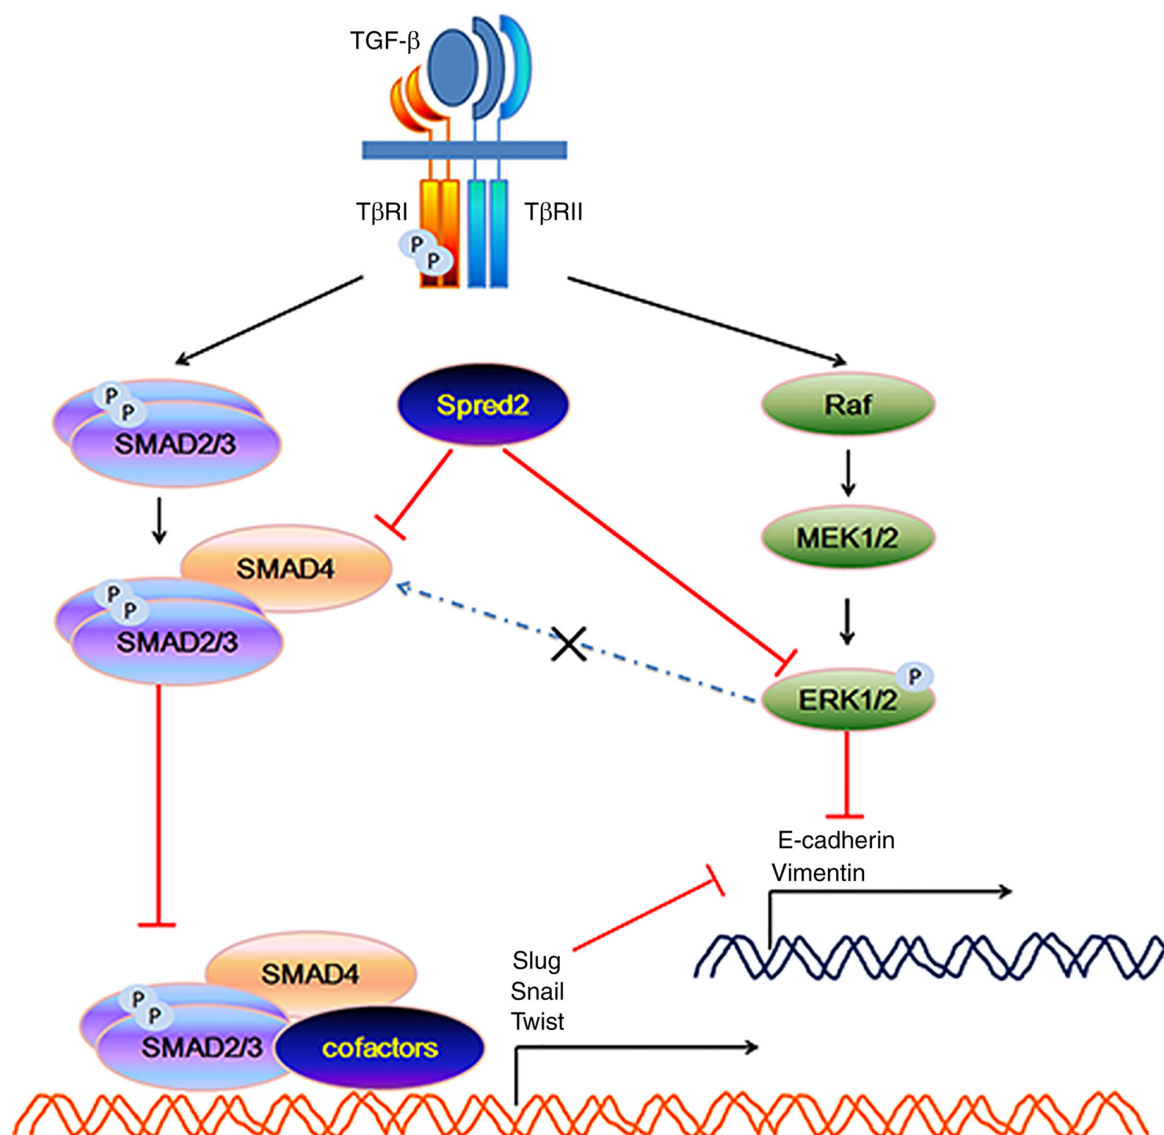

Supplement: Supplementary file 1 [file downloadSupplementary]
